# Supplementary material for: Deconstructing Complex Multimorbidity in the Very Old: Findings from the Newcastle 85+ Study
Source: Hindawi journal article supplement (doi:10.1155/2016/8745670), 2016-01-01
Supplement: f1 [file 8745670.f1.pdf]

## **APPENDIX: Deconstructing complex multimorbidity in the very old: findings from the Newcastle 85+ Study**

### **FURTHER DETAILS OF SAMPLE SELECTION**

The sampling frame for the Newcastle 85+ Study comprised all people born in 1921 who were permanently registered with a participating general practice in Newcastle upon Tyne or North Tyneside Primary Care Trusts (North-East England). We approached all 64 general practices in these trusts to participate in the study, and 82.8% (53/64) agreed. Practices who participated were similar to those who did not across key practice variables.[1] General practitioners were asked to review patient lists before mail-out and to exclude only those people with end stage terminal illness and those who might pose a safety risk to a nurse visiting alone. Excepting these exclusions, all those remaining in the sampling frame were sent a letter of invitation by the study team whether living at home or in an institution and regardless of their state of health. Recruitment and assessment took place over a 17 month period in 2006-7.

The recruitment profile is summarised in Supplementary Figure 1. Of the 1453 people eligible to participate in the Newcastle 85+ Study - that is registered with a participating general practice and still alive - 1042 (71.7%) were recruited. In total, 851 people (58.6% of those eligible) were recruited to health assessment plus review of general practice records, with an additional 188 (12.9%) recruited to record review only and 3 (0.2%) to health assessment only. The Newcastle 85+ cohort (health assessment sample) was socio-demographically representative of the local population, and of England and Wales, including the proportion in care homes.[1] The analysis reported required data from both the health assessment and general practice records. Exclusion of participants due to study withdrawal with request to destroy data (n=2) and incomplete general practice records (n=4) left 845 participants with this data, 58.2% of those eligible to participate. Complete data on all 15 diseases and 5 geriatric syndromes/impairments (termed geriatric conditions) was available for 710 of these participants (84.0%), who formed the sample for the principal analyses. Missing data arose from non-completion of questionnaires, electrocardiograms or blood tests. Comparison of the groups with and without complete data for all 20 conditions showed that those with missing data were more

likely to be female, to be resident in an institution, to have a higher prevalence of osteoporosis, urinary incontinence and cognitive impairment, and to be more disabled than those with complete data (Supplementary Table 1).

## **FURTHER INFORMATION ON MEASURES**

The study questionnaires and the proforma used for the review of general practice records are available on the Newcastle 85+ Study website:

<http://research.ncl.ac.uk/85plus/>

## **REFERENCE**

1. Collerton J, Davies K, Jagger C, *et al.* Health and disease in 85 year olds: baseline findings from the Newcastle 85+ cohort study. *BMJ* 2009; 339: b4904.

## Supplementary Figure 1: Sample selection flow chart

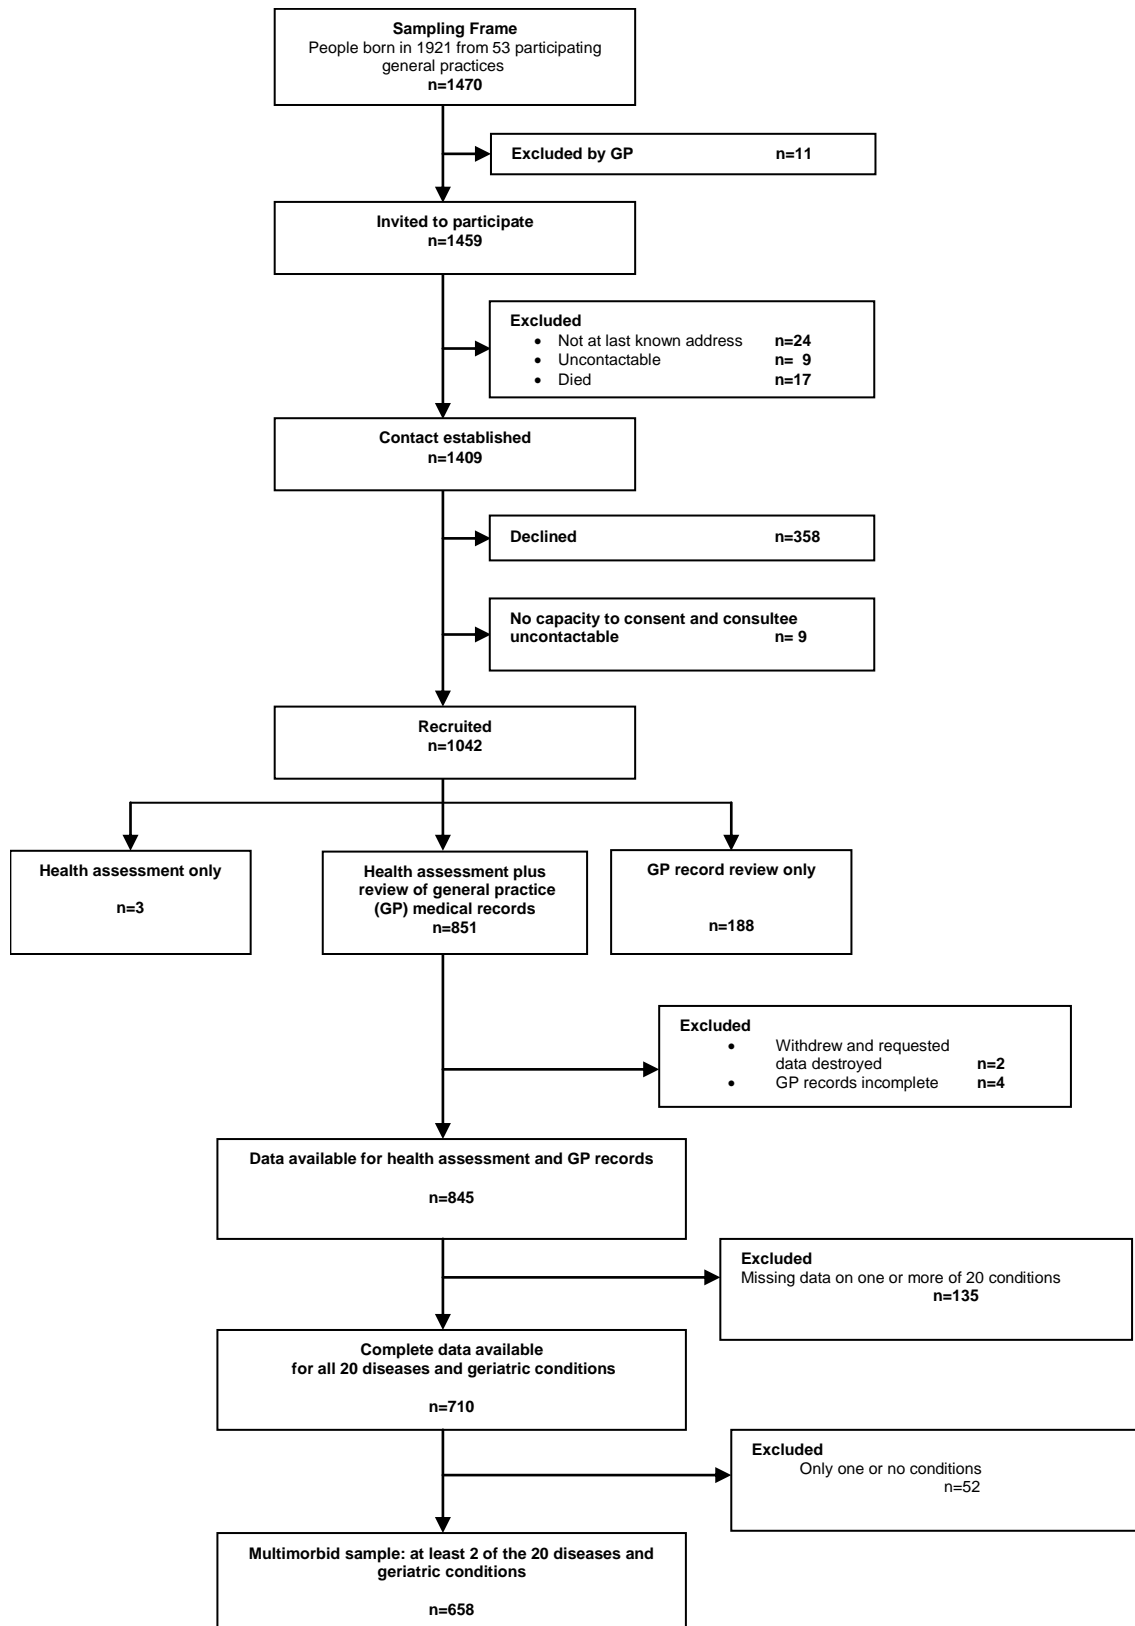

**Supplementary Table 1: Characteristics of groups with and without complete data on all 20 conditions**

|                                              | Group with complete data on all 20 conditions<br>N=710<br>(maximum*) | Group without complete data on all 20 conditions<br>N=135<br>(maximum*) | P-value <sup>†</sup> |
|----------------------------------------------|----------------------------------------------------------------------|-------------------------------------------------------------------------|----------------------|
| Female, %(n)                                 | 59.9 (425)                                                           | 74.8 (101)                                                              | <b>0.001</b>         |
| Living in institution, %(n)                  | 5.9 (42)                                                             | 32.6 (44)                                                               | <b>&lt;0.0001</b>    |
| Years in full-time education, %(n)           |                                                                      |                                                                         | 0.653                |
| 0-9                                          | 64.7 (458)                                                           | 62.8 (76)                                                               |                      |
| 10-11                                        | 22.7 (161)                                                           | 23.1 (28)                                                               |                      |
| 12+                                          | 12.6 (89)                                                            | 14.1 (17)                                                               |                      |
| Diseases, %(n)                               |                                                                      |                                                                         |                      |
| <i>Hypertension</i>                          | 57.8 (410)                                                           | 54.8 (74)                                                               | 0.528                |
| <i>Ischaemic heart disease</i>               | 36.1 (256)                                                           | 42.3 (41)                                                               | 0.234                |
| <i>Heart failure</i>                         | 11.1 (79)                                                            | 15.6 (21)                                                               | 0.144                |
| <i>Atrial fibrillation or flutter</i>        | 13.5 (96)                                                            | 21.5 (17)                                                               | 0.054                |
| <i>Cerebrovascular disease</i>               | 21.1 (150)                                                           | 20.7 (28)                                                               | 0.920                |
| <i>Peripheral vascular disease</i>           | 7.3 (52)                                                             | 5.2 (7)                                                                 | 0.371                |
| <i>Osteoarthritis</i>                        | 57.0 (405)                                                           | 53.3 (72)                                                               | 0.426                |
| <i>Inflammatory arthritis</i>                | 3.8 (27)                                                             | 6.7 (9)                                                                 | 0.131                |
| <i>Osteoporosis</i>                          | 12.1 (86)                                                            | 19.3 (26)                                                               | <b>0.025</b>         |
| <i>Chronic obstructive pulmonary disease</i> | 16.5 (117)                                                           | 17.0 (23)                                                               | 0.837                |
| <i>Asthma</i>                                | 4.1 (29)                                                             | 6.7 (9)                                                                 | 0.185                |
| <i>Diabetes mellitus</i>                     | 13.5 (96)                                                            | 11.9 (16)                                                               | 0.600                |
| <i>Thyroid disease</i>                       | 14.8 (105)                                                           | 11.9 (16)                                                               | 0.372                |
| <i>Cancer within 5 years</i>                 | 6.2 (44)                                                             | 7.5 (10)                                                                | 0.583                |
| <i>Renal impairment</i>                      | 23.8 (169)                                                           | 24.6 (16)                                                               | 0.883                |
| Geriatric conditions, %(n)                   |                                                                      |                                                                         |                      |
| <i>Urinary incontinence</i>                  | 31.3 (222)                                                           | 42.4 (42)                                                               | <b>0.027</b>         |
| <i>Falls</i>                                 | 17.2 (122)                                                           | 21.8 (22)                                                               | 0.258                |
| <i>Visual impairment</i>                     | 36.2 (257)                                                           | 42.5 (48)                                                               | 0.199                |
| <i>Hearing impairment</i>                    | 60.4 (429)                                                           | 55.4 (72)                                                               | 0.282                |
| <i>Cognitive impairment</i>                  | 6.9 (49)                                                             | 21.5 (20)                                                               | <b>&lt;0.0001</b>    |
| Disability score <sup>‡</sup> , median (IQR) | 3 (1 - 6)                                                            | 8 (3 - 13)                                                              | <b>&lt;0.0001</b>    |

\*Sample size for groups with and without complete data on all 20 conditions may be less than the maximum specified due to missing data for comparator variables

<sup>†</sup>P-value for no difference between groups with/without complete data on all 20 conditions

<sup>‡</sup>Total number of activities of daily living performed with difficulty or requiring an aid/appliance or personal help[1]

**Supplementary Table 2: Prevalence of diseases and geriatric conditions in complete case sample (N=710), by sex**

|                                       | <b>Men<br/>% (n)</b> | <b>Women<br/>% (n)</b> | <b>P-value*</b>   |
|---------------------------------------|----------------------|------------------------|-------------------|
| <b>Diseases</b>                       |                      |                        |                   |
| Hypertension                          | 53.3 (152)           | 60.7 (258)             | 0.051             |
| Ischaemic heart disease               | 39.7 (113)           | 33.7 (143)             | 0.103             |
| Heart failure                         | 11.6 (33)            | 10.8 (46)              | 0.754             |
| Atrial fibrillation or flutter        | 17.2 (49)            | 11.1 (47)              | <b>0.019</b>      |
| Cerebrovascular disease               | 24.2 (69)            | 19.1 (81)              | 0.099             |
| Peripheral vascular disease           | 9.5 (27)             | 5.9 (25)               | 0.072             |
| Osteoarthritis                        | 47.4 (135)           | 63.5 (270)             | <b>&lt;0.0001</b> |
| Inflammatory arthritis                | 2.5 (7)              | 4.7 (20)               | 0.124             |
| Osteoporosis                          | 3.2 (9)              | 18.1 (77)              | <b>&lt;0.0001</b> |
| Chronic obstructive pulmonary disease | 17.5 (50)            | 15.8 (67)              | 0.531             |
| Asthma                                | 2.5 (7)              | 5.2 (22)               | 0.073             |
| Diabetes mellitus                     | 15.4 (44)            | 12.2 (52)              | 0.221             |
| Thyroid disease                       | 6.3 (18)             | 20.5 (87)              | <b>&lt;0.0001</b> |
| Cancer within 5 years                 | 8.1 (23)             | 4.9 (21)               | 0.090             |
| Renal impairment                      | 22.5 (64)            | 24.7 (105)             | 0.490             |
| <b>Geriatric conditions</b>           |                      |                        |                   |
| Urinary incontinence                  | 22.5 (64)            | 37.2 (158)             | <b>&lt;0.0001</b> |
| Falls                                 | 17.9 (51)            | 16.7 (71)              | 0.681             |
| Visual impairment                     | 31.9 (91)            | 39.1 (166)             | 0.053             |
| Hearing impairment                    | 65.3 (186)           | 57.2 (243)             | <b>0.031</b>      |
| Cognitive impairment                  | 6.3 (18)             | 7.3 (31)               | 0.614             |

\*P-value for no difference between men and women

**Supplementary Table 3: 20 diseases and geriatric conditions - proportion of cases with comorbidity and number of co-occurring conditions. Data are presented including and excluding geriatric conditions in the definition of co-occurring condition**

|                                       | Total number of cases with index condition | Including geriatric conditions |                |                                    |                      | Excluding geriatric conditions |                |                                    |                      |
|---------------------------------------|--------------------------------------------|--------------------------------|----------------|------------------------------------|----------------------|--------------------------------|----------------|------------------------------------|----------------------|
|                                       |                                            | Cases with comorbidity         |                | Number of co-occurring conditions* |                      | Cases with comorbidity         |                | Number of co-occurring conditions* |                      |
|                                       |                                            | N                              | % of all cases | Median                             | Inter-quartile range | N                              | % of all cases | Median                             | Inter-quartile range |
| <b>Diseases</b>                       |                                            |                                |                |                                    |                      |                                |                |                                    |                      |
| Hypertension                          | 410                                        | 396                            | 96.6           | 4                                  | 3-5                  | 384                            | 93.7           | 2                                  | 2-4                  |
| Ischaemic heart disease               | 256                                        | 254                            | 99.2           | 4                                  | 3-6                  | 247                            | 96.5           | 3                                  | 2-4                  |
| Heart failure                         | 79                                         | 79                             | 100.0          | 6                                  | 4-7                  | 79                             | 100.0          | 4                                  | 3-5                  |
| Atrial fibrillation or flutter        | 96                                         | 94                             | 97.9           | 5                                  | 4-6                  | 90                             | 93.8           | 4                                  | 2-4                  |
| Cerebrovascular disease               | 150                                        | 148                            | 98.7           | 5                                  | 3-6                  | 144                            | 96.0           | 3                                  | 2-4                  |
| Peripheral vascular disease           | 52                                         | 52                             | 100.0          | 5                                  | 4-6                  | 51                             | 98.1           | 4                                  | 2-5                  |
| Osteoarthritis                        | 405                                        | 397                            | 98.0           | 4                                  | 3-5                  | 367                            | 90.6           | 3                                  | 2-4                  |
| Inflammatory arthritis                | 27                                         | 27                             | 100.0          | 5                                  | 4-6                  | 27                             | 100.0          | 3                                  | 2-4                  |
| Osteoporosis                          | 86                                         | 85                             | 98.8           | 5                                  | 3-6                  | 84                             | 97.7           | 3                                  | 2-4                  |
| Chronic obstructive pulmonary disease | 117                                        | 115                            | 98.3           | 5                                  | 3-6                  | 107                            | 91.5           | 3                                  | 2-5                  |
| Asthma                                | 29                                         | 28                             | 96.6           | 4                                  | 3-6                  | 28                             | 96.6           | 3                                  | 2-4                  |
| Diabetes mellitus                     | 96                                         | 96                             | 100.0          | 5                                  | 3-6.5                | 94                             | 97.9           | 3                                  | 2-5                  |
| Thyroid disease                       | 105                                        | 104                            | 99.1           | 5                                  | 3-6                  | 101                            | 96.2           | 3                                  | 2-4                  |
| Cancer within 5 years                 | 44                                         | 44                             | 100.0          | 5                                  | 3.5-7                | 43                             | 97.7           | 4                                  | 3-5                  |
| Renal Impairment                      | 169                                        | 169                            | 100.0          | 5                                  | 4-6                  | 166                            | 98.2           | 4                                  | 2-4                  |
| <b>Geriatric conditions</b>           |                                            |                                |                |                                    |                      |                                |                |                                    |                      |
| Urinary incontinence                  | 222                                        | 222                            | 100.0          | 5                                  | 3-6                  | 194                            | 87.4           | 2                                  | 1-4                  |
| Falls                                 | 122                                        | 121                            | 99.2           | 5                                  | 3-6                  | 101                            | 82.8           | 2                                  | 1-4                  |
| Visual impairment                     | 257                                        | 257                            | 100.0          | 4                                  | 3-5                  | 216                            | 84.1           | 2                                  | 1-3                  |
| Hearing impairment                    | 429                                        | 417                            | 97.2           | 4                                  | 3-5                  | 354                            | 82.5           | 2                                  | 1-4                  |
| Cognitive impairment                  | 49                                         | 49                             | 100.0          | 5                                  | 3-6                  | 36                             | 73.5           | 2                                  | 2-4                  |

\*The median number of co-occurring conditions is reported for those cases with comorbidity i.e. at least one condition in addition to the index disease
